# Supplementary material for: Immobilization of trypsin in the layer-by-layer coating of graphene oxide and chitosan on in-channel glass fiber for microfluidic proteolysis
Source: Royal Society of Chemistry journal article supplement (doi:10.1039/c1an15690j), 2011-01-01

## Electronic Supplementary Information (ESI)

**Table S1.** Peptide mapping results of the tryptic digests of BSA and MYO obtained by using a core-changeable GO-based microchip bioreactor and in-solution digestion coupled with MALDI-TOF MS.

| Digestion methods | Protein | Concentration (ng/ $\mu$ L) | Digestion time | Sequence coverage, (%) | Peptides matched | Amino acids identified |
|-------------------|---------|-----------------------------|----------------|------------------------|------------------|------------------------|
| Microreactor      | BSA     | 200                         | <10 s          | 49                     | 33               | 296                    |
| Microreactor      | BSA     | 20                          | <10 s          | 28                     | 16               | 173                    |
| In-solution       | BSA     | 200                         | 12 h           | 38                     | 18               | 236                    |
| Microreactor      | MYO     | 200                         | <10 s          | 78                     | 16               | 120                    |
| Microreactor      | MYO     | 20                          | <10 s          | 64                     | 12               | 99                     |
| In-solution       | MYO     | 200                         | 12 h           | 69                     | 10               | 107                    |

5

**Fig. S1** Schematic showing the layer-by-layer self-assembly process of CTS and GO on a piece of glass fiber. (A) Dipping the glass fiber (a) in 10 mg/mL CTS aqueous solution containing 20 mg/mL acetic acid (b) for 5 min; (B) rinsing the modified fiber in doubly distilled water (c) for 30 s; (C) dipping the modified fiber in 2 mg/mL GO aqueous solution (d) for 5 min; (D) rinsing the modified fiber in (c) for 30 s; (E) immobilizing trypsin in the LBL-assembled coating on (a) by dipping the modified fiber in a 5 mg/mL trypsin in 50 mM Tris-HCl buffer (pH 8.0) containing 20 mM CaCl<sub>2</sub> (e) in a 4 °C refrigerator for 2 h.

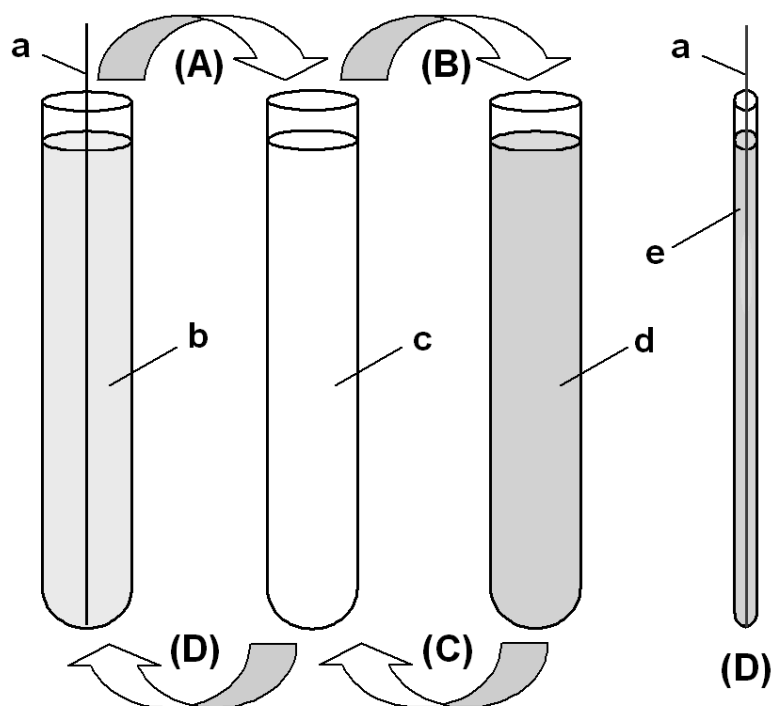

**Fig. S2** SEM images of GO sheets. Conditions: accelerating voltage, 20 kV; magnification, ×5000.

15

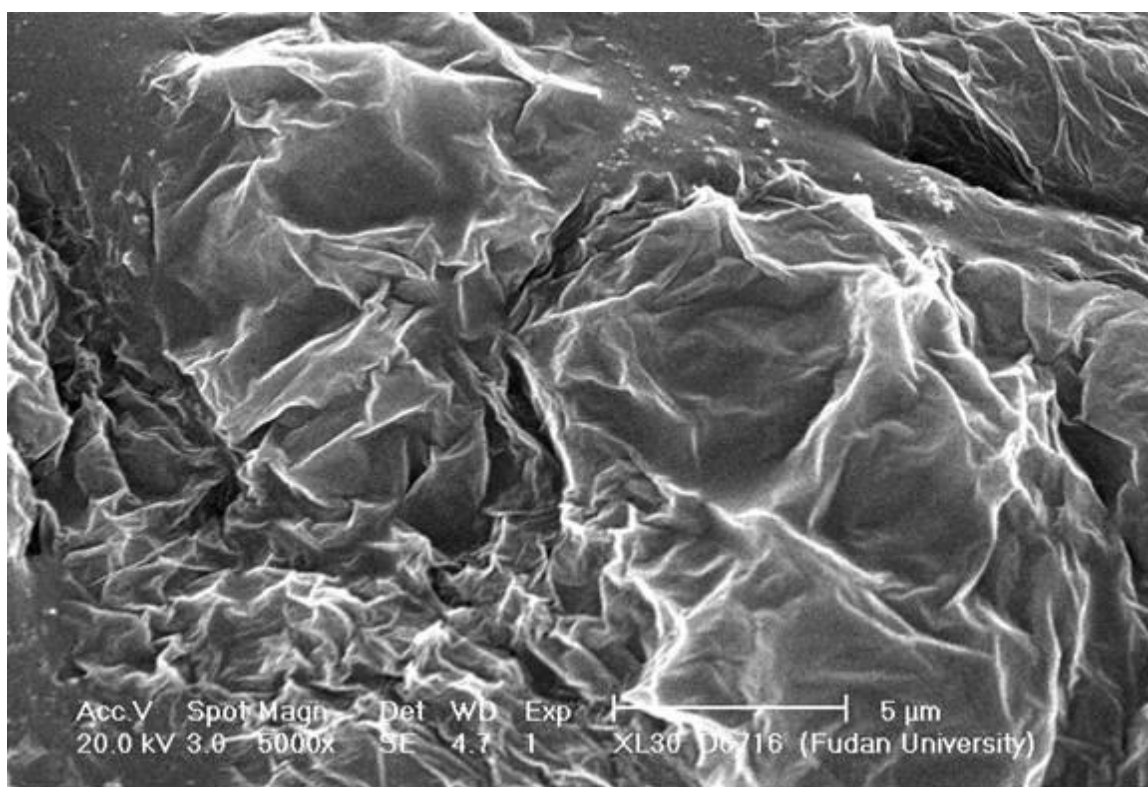

**Fig. S3** MALDI TOF mass spectra of the digest of (A) BSA and (B) MYO (200 ng/ $\mu$ L) obtained by using conventional in-solution proteolysis in 10 mM  $\text{NH}_4\text{HCO}_3$  buffer (pH 8.1). Digestion time, 12 h; trypsin/substrate ratio, 1:40; all matched peptides were marked with “\*?”.

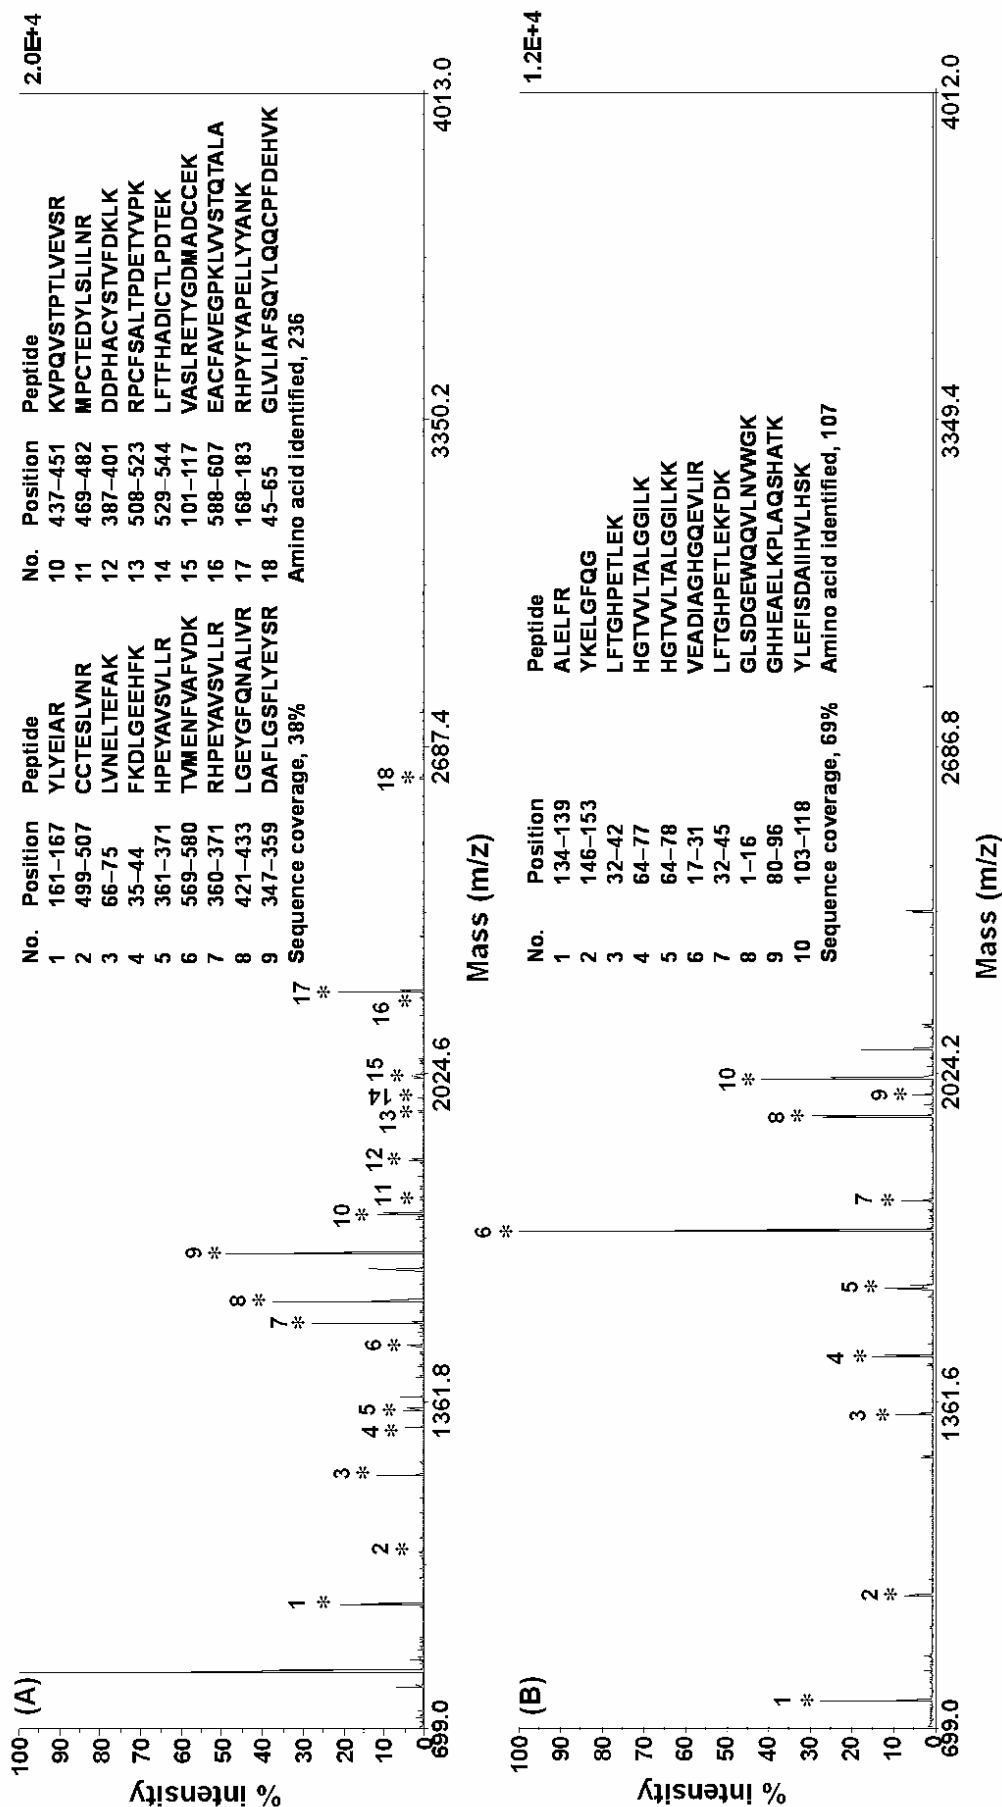

**Fig. S4** MALDI-TOF mass spectra of the digests of (A) Cyt-*c* and (B) HEM obtained by using a core-changeable GO-based microchip bioreactor at a flow rate of 2.0  $\mu\text{L}/\text{min}$  (digestion time, <10 s; all peptides matched were marked with “\*”). The concentrations of proteins were 200 ng/ $\mu\text{L}$  in 10 mmol/L  $\text{NH}_4\text{HCO}_3$  (pH 8.1).

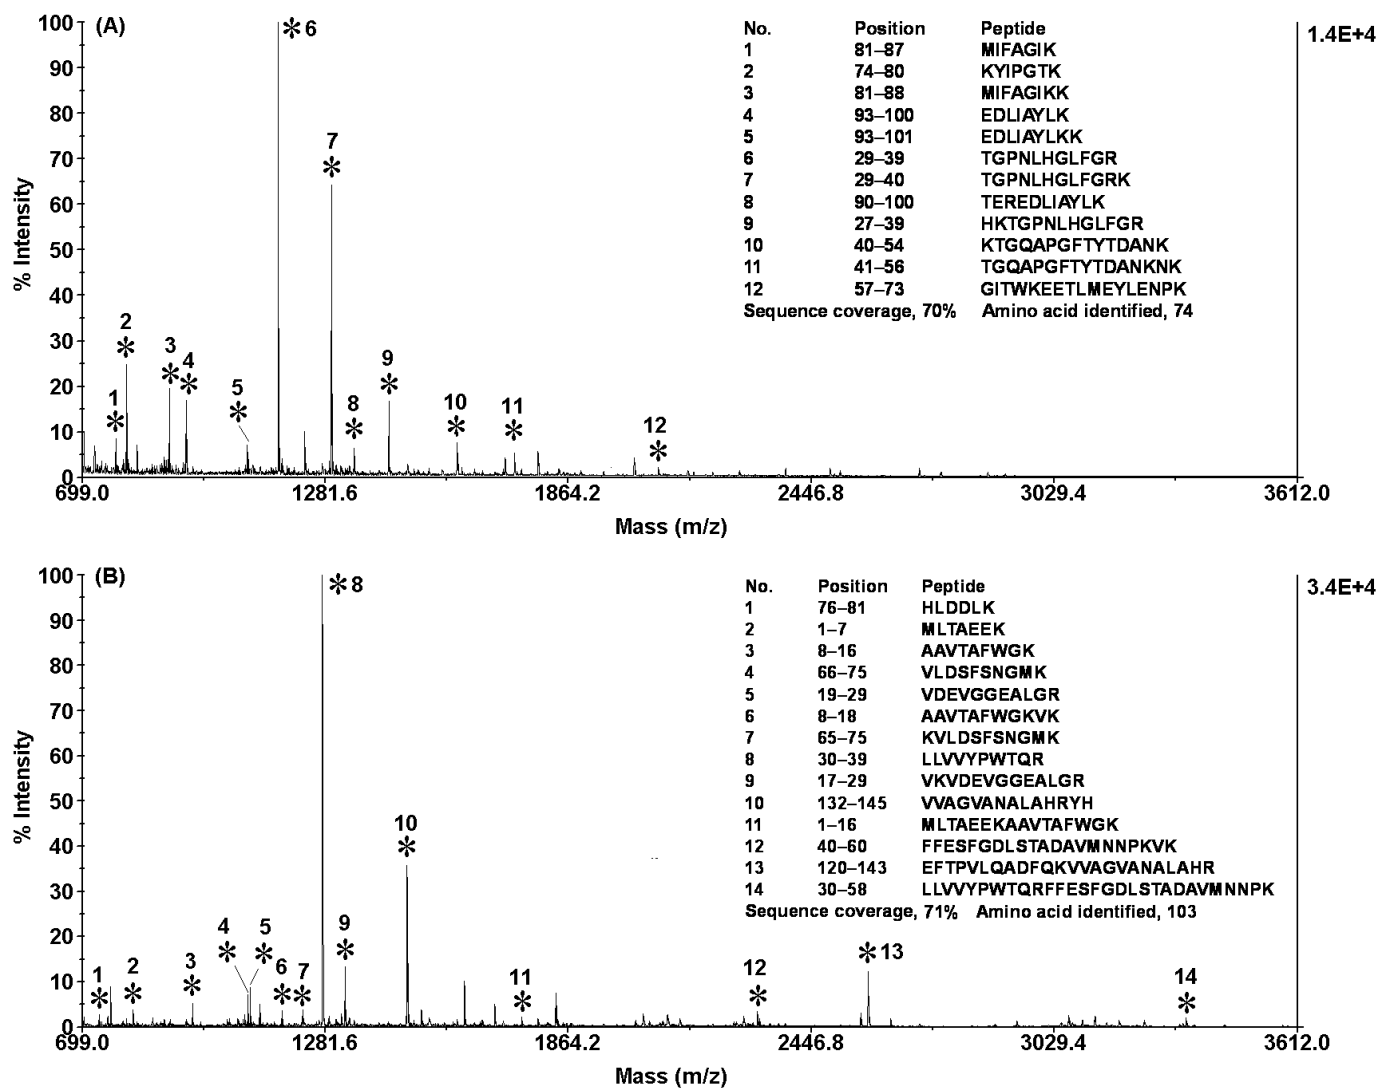

Supplement: c1an15690j.pdf [file c1an15690j.pdf]
